# Supplementary material for: Synthesis of a calcium silicate-carbonate at 122 GPa reveals a missing link in deep-mantle chemistry of silicates and carbonates
Source: Research Square preprint supplement (doi:10.21203/rs.3.rs-8308717/v1), 2025-12-09

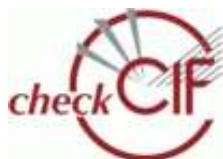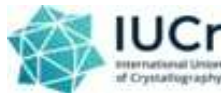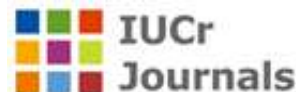

## checkCIF/PLATON report

Structure factors have been supplied for datablock(s) I

THIS REPORT IS FOR GUIDANCE ONLY. IF USED AS PART OF A REVIEW PROCEDURE FOR PUBLICATION, IT SHOULD NOT REPLACE THE EXPERTISE OF AN EXPERIENCED CRYSTALLOGRAPHIC REFEREE.

No syntax errors found.      CIF dictionary      Interpreting this report

### Datablock: I

---

|                        |                          |                         |
|------------------------|--------------------------|-------------------------|
| Bond precision:        | O- C = 0.0072 Å          | Wavelength=0.41000      |
| Cell:                  | a=4.4750 (2)<br>alpha=90 | b=6.4691 (8)<br>beta=90 |
| Temperature:           | 293 K                    | c=9.013 (3)<br>gamma=90 |
|                        | Calculated               | Reported                |
| Volume                 | 260.92 (9)               | 260.919 (2)             |
| Space group            | C m c m                  | C m c m                 |
| Hall group             | -C 2c 2                  | -C -2x; -2yc            |
| Moiety formula         | C4 O14 Si2, 2 (Ca)       | ?                       |
| Sum formula            | C4 Ca2 O14 Si2           | C4 Ca2 O14 Si2          |
| Mr                     | 408.38                   | 408.40                  |
| Dx, g cm <sup>-3</sup> | 5.198                    | 5.198                   |
| Z                      | 2                        | 2                       |
| Mu (mm <sup>-1</sup> ) | 0.626                    | 0.616                   |
| F000                   | 408.0                    | 408.0                   |
| F000'                  | 408.49                   |                         |
| h, k, lmax             | 7, 11, 15                | 5, 11, 12               |
| Nref                   | 404                      | 83                      |
| Tmin, Tmax             | 0.998, 0.999             | 0.599, 1.000            |
| Tmin'                  | 0.998                    |                         |

Correction method= # Reported T Limits: Tmin=0.599 Tmax=1.000  
AbsCorr = MULTI-SCAN

Data completeness= 0.205

Theta(max)= 20.760

R(reflections)= 0.0437( 72)

wR2(reflections)=

wR= 0.0564( 83)

S = 2.060

Npar= 16

---

The following ALERTS were generated. Each ALERT has the format

**test-name\_ALERT\_alert-type\_alert-level.**

Click on the hyperlinks for more details of the test.

---

### Alert level A

PLAT027\_ALERT\_3\_A \_diffn\_refl\_theta\_full value (too) Low ..... 8.11 Degree

**Author Response: Measurement in Diamond anvil cell with 33 degree angle opening**

PLAT029\_ALERT\_3\_A \_diffn\_measured\_fraction\_theta\_full value Low . 0.650 Why?

**Author Response: Measurement in Diamond anvil cell with 33 degree angle opening**

---

### Alert level C

GOODF01\_ALERT\_2\_C The least squares goodness of fit parameter lies  
outside the range 0.80 <> 2.00

Goodness of fit given = 2.060

PLAT088\_ALERT\_3\_C Poor Data / Parameter Ratio ..... 9.44 Note

PLAT127\_ALERT\_1\_C Implicit Hall Symbol Inconsistent with Explicit -C -2x;-2y Check

PLAT741\_ALERT\_1\_C Bond Calc 4.4750(15), Rep 4.47500 ..... Missing s.u.

CA1 -CA1 1\_555 1\_455 ..... # 1 Check

PLAT741\_ALERT\_1\_C Bond Calc 4.4750(15), Rep 4.47500 ..... Missing s.u.

CA1 -CA1 1\_555 1\_655 ..... # 2 Check

PLAT920\_ALERT\_1\_C Theta(Max) in CIF and FCF Differ by ..... 0.20 Degree

PLAT975\_ALERT\_2\_C Check Calcd Resid. Dens. 0.79Ang From Ol . 0.52 eA-3

PLAT992\_ALERT\_5\_C Repd & Actual \_reflns\_number\_gt Values Differ by 48 Check

---

### Alert level G

ABSMU01\_ALERT\_1\_G Calculation of \_exptl\_absorpt\_correction\_mu  
not performed for this radiation type.

PLAT004\_ALERT\_5\_G Polymeric Structure Found with Maximum Dimension 2 Info

PLAT005\_ALERT\_5\_G No Embedded Refinement Details Found in the CIF Please Do !

PLAT040\_ALERT\_1\_G No H-atoms in this Carbon Containing Compound .. Please Check

PLAT092\_ALERT\_4\_G Check: Wavelength Given is NOT Cu,Ga,Mo,Ag,In Ka 0.41000 Ang.

PLAT152\_ALERT\_1\_G The Supplied and Calc. Volume s.u. Differ by ... 88 Units

PLAT199\_ALERT\_1\_G Reported \_cell\_measurement\_temperature ..... (K) 293 Check

PLAT200\_ALERT\_1\_G Reported \_diffn\_ambient\_temperature ..... (K) 293 Check

PLAT808\_ALERT\_5\_G No Parseable SHELXL Style Weighting Scheme Found Please Check

PLAT883\_ALERT\_1\_G Absent Datum for \_atom\_sites\_solution\_primary .. Please Do !

PLAT910\_ALERT\_3\_G Missing FCF Reflection(s) Below Theta(Min) [Deg]= 3.45 Note

1 1 0, 0 0 2,

```

PLAT911_ALERT_3_G Missing FCF Refl Between Thmin & STh/L= 0.600 58 Report
      2 0 0, 4 0 0, 3 1 0, 5 1 0, 2 2 0, 4 2 0,
      3 3 0, 4 4 0, 3 5 0, 3 1 1, 5 1 1, 4 2 1,
      3 3 1, 4 4 1, 3 5 1, 2 0 2, 4 0 2, 3 1 2,
      5 1 2, 4 2 2, 4 4 2, 5 1 3, 0 2 3, 4 2 3,
      4 4 3, 0 6 3, 0 0 4, 4 0 4, 0 2 4, 4 2 4,
      ( 28 More Missing: see the .ckf listing file)
PLAT912_ALERT_4_G Missing # of FCF Reflections Above STh/L= 0.600 136 Note
PLAT929_ALERT_5_G No Weight Pars,Obs and Calc R1,wR2,S not Checked ! Info
PLAT950_ALERT_5_G Calculated (ThMax) and CIF-Reported Hmax Differ 2 Units
PLAT952_ALERT_5_G Calculated (ThMax) and CIF-Reported Lmax Differ. 3 Units
PLAT956_ALERT_1_G Calculated (ThMax) and Actual (FCF) Hmax Differ 2 Units
PLAT958_ALERT_1_G Calculated (ThMax) and Actual (FCF) Lmax Differ. 3 Units
PLAT966_ALERT_5_G Note: Non-Standard (i.e. 2.0) OMIT Threshold of 3.0 Sig(I)
PLAT969_ALERT_5_G The 'Henn et al.' R-Factor-gap value ..... 1.797 Note
      Predicted wR2: Based on SigI**2 6.90 or SHELX Weight 6.90

```

---

```

2 ALERT level A = Most likely a serious problem - resolve or explain
0 ALERT level B = A potentially serious problem, consider carefully
8 ALERT level C = Check. Ensure it is not caused by an omission or oversight
20 ALERT level G = General information/check it is not something unexpected

12 ALERT type 1 CIF construction/syntax error, inconsistent or missing data
2 ALERT type 2 Indicator that the structure model may be wrong or deficient
5 ALERT type 3 Indicator that the structure quality may be low
2 ALERT type 4 Improvement, methodology, query or suggestion
9 ALERT type 5 Informative message, check

```

---

It is advisable to attempt to resolve as many as possible of the alerts in all categories. Often the minor alerts point to easily fixed oversights, errors and omissions in your CIF or refinement strategy, so attention to these fine details can be worthwhile. It is up to the individual to critically assess their own results and, if necessary, seek expert advice.

---

**PLATON version of 26/09/2025; check.def file version of 20/09/2025**

---

## duplicate check

A reduced cell check using CCDC's cellCheckCSD service has found that one or more structures in this CIF are similar to those previously published in the CSD or the ICSD.

---

Datablock 1 - ellipsoid plot

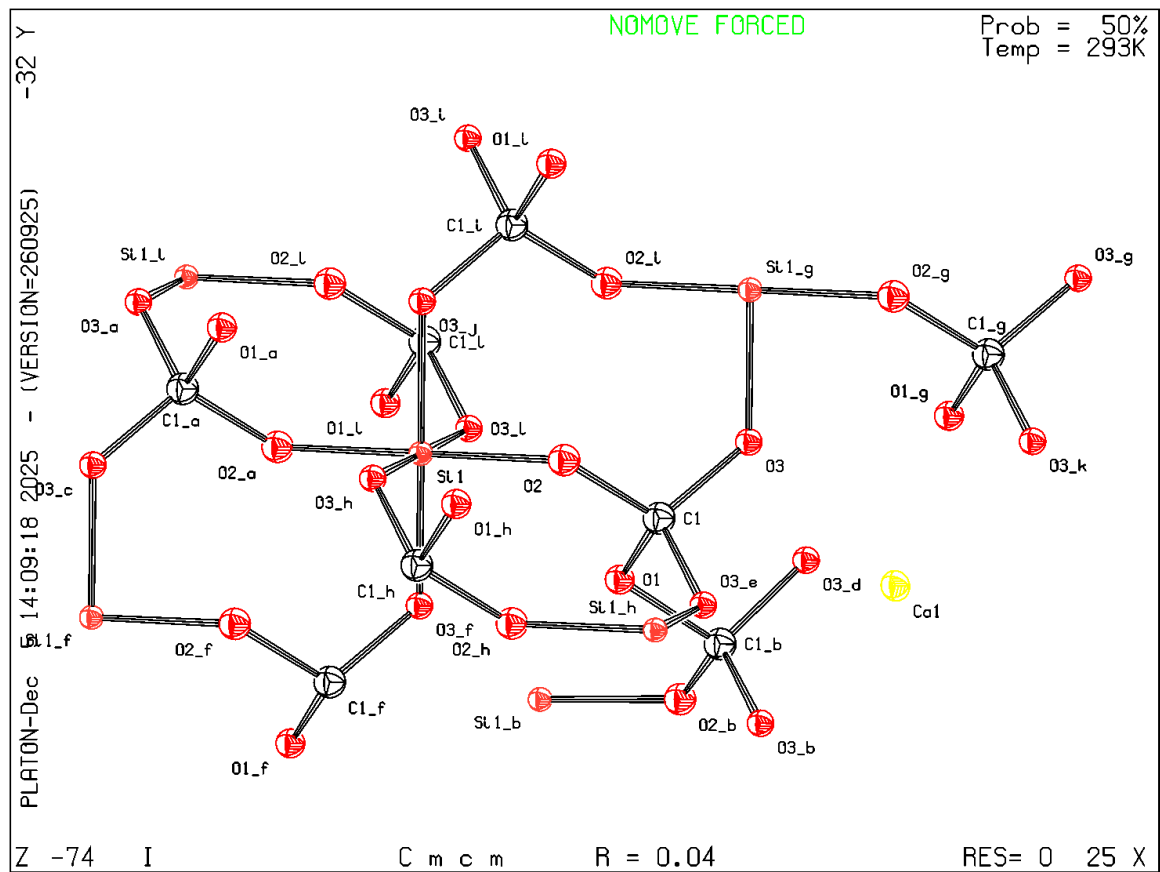

Supplement: Supplementary file 1 [file 87d15a3f8bd0fe97d5ec2ac0.pdf]
